# Supplementary material
Source: publisher figshare collection journal article supplement (https://gsajournals.figshare.com/ndownloader/files/28518009)
Supplement: Supplementary file 1 [file 28518009]

Genome archaeology of two laboratory *Salmonella enterica enterica* sv Typhimurium

**Supplementary Table 1 Pedigree, genetic steps and markers brought into LB5000 or strains used for phage propagation**

Julie Zaworski*†, Oyut Dagva*§, Anthony W Kingston*‡, Alexey Fomenkov*, Richard D. Morgan*, Lionello Bossi§, Elisabeth A. Raleigh* [orcid.org/0000-0003-0745-9925](https://orcid.org/0000-0003-0745-9925)

*New England Biolabs, Ipswich MA, 01938-2723

§University Paris-Saclay, CEA, CNRS, Institute for Integrative Biology of the Cell (I2BC), 91198, Gif-sur-Yvette, France

| Wild ancestor | Relevant marker in LB5000 | Strain name in reference | Reference | Original name (other names) | Other reference | Recipient or strain mutagenized | Donor if gene transfer | construction, comment Reference | Mode of construction, phenotype comment |
| --- | --- | --- | --- | --- | --- | --- | --- | --- | --- |
| *Salmonella enterica* sv Abony (Abony) | §H1-b H2-e,n,x, Fels2- | SW803 | (Spicer and Datta 1959) | *S. abony* 103 | (original) EDWARDS, P.R. and BRUNER, D. W. (1942). Serological identification of Salmonella cultures. Circ. K y Agric. Exp. Stn, no. 54. |  |  |  |  |
| *Salmonella enterica* sv Typhimurium LT2 (LT2) | Framework | LT2 | (Spicer and Datta 1959) |  | (original) (Zinder and Lederberg 1952) | LT2 |  |  |  |
| LT2 | *metA22 trpC2* | SL270 | (Spicer and Datta 1959) |  |  | LT2 |  |  | mutagenesis-->metA- trpB- |
| LT2 x Abony | b1.2 | SD7 | (Spicer and Datta 1959) |  |  | SL270 | SW803 | (Joys and Stocker 1969) | Transduction A-->i 1.2->b-1.2; fla+ phase I non-I with HI of Abony, antigen b. *nml* was cotransduced. (N-methyllysine decoration on flagellin) |
| LT2 x Abony | H1-b H2-e,n,x, Fels2- | SD14 | (Spicer and Datta 1959) |  | (additional genotype information in (Joys and Stocker 1969; Wilkinson et al. 1972)) | SD7 | SW803 | (Spicer and Datta 1959) | Transduction B 1.2-->b-enx Fels2- |
| LT2 x Abony | *flaA66 rpsL120* unmapped additional mutation affecting StrR | SL696 | (Joys and Stocker 1965) and Smith and Stocker unpub cited in Wilkinson et al (Wilkinson et al. 1972) | (other name SGSC1649) | (additional genotype information in (Wilkinson et al. 1972)) | SD14 |  |  | spontaneous mutation--> Fla- high StrR Rfa+ |
| LT2 x Abony | *xyl-404 metE551* | SL1027 | (Wilkinson et al. 1972) |  |  | SL696 |  | (Kuo and Stocker 1970) | mutagenesis-->xyl- metE- |
| LT2 x Abony | interlab transfer, new name | 4247 | (Bullas and Colson 1975) | SL1027 | (Wilkinson et al. 1972) |  |  |  |  |
| LT2 x Abony | *hsdL6* | 4274 | (Bullas and Colson 1975) |  |  | 4247 |  |  | NG mutagenesis R-M+ LT |
| LT2 x Abony | sister lineage to LB5000 (allows growth of unmodified phage) | 4278 | (Bullas and Colson 1975) |  |  | 4247 |  |  | NG mutagenesis R-M- LT |
| LT2 x Abony | sister lineage to LB5000 (allows growth of unmodified phage) | 4414† | (Bullas and Colson 1975) |  |  | 4274* |  |  | NG mutagenesis R-M- SA |
| LT2 x Abony | *hsdSA29* | 4419† | (Bullas and Colson 1975) | (other names CL4419, SL1654, SGSC261) |  | 4274* |  | (Bullas and Colson 1975) | NG mutagenesis R-M+ SA |
| LT2 x Abony | sister lineage to LB5000 (allow P1 transduction) | 4526 | (Bullas and Colson 1975) |  |  | 4419 |  |  | phage Felix-O resistance selection-->Gal- P1S |
| LT2 x Abony | *hsdSB121* | unnamed | (Bullas and Ryu 1983) |  |  | 4419 |  |  | NG mutagenesis, screening with F' lac for increased Lac+ transfer; allele number culled from SGSC listings of descendants of LB5000 |
| LT2 x Abony | F- | LB5000 | (Bullas and Ryu 1983) |  |  | unnamed intermediate |  |  | Spontaneous segregation of F'lac |
| LT2 x Abony | interlab transfer, new name | TR6578 |  |  |  |  |  |  | Roth lab from Bullas |
| LT2 x Abony | interlab transfer, new name | G251 |  |  |  |  |  |  | Segall lab from Roth |
| LT2 x Abony | interlab transfer, new name | STK005 |  |  |  |  |  |  | Raleigh lab from Segall |

§This transduction will have changed both the assignable serovar and the lysotype of the strain.

†*These strains only make sense if derived from 4274*, instead of 4247 as listed in (Bullas and Colson 1975)

**References**

Bullas LR, Colson C. 1975. DNA restriction and modification systems in *Salmonella*. III. SP, a *Salmonella potsdam* system allelic to the SB system in *Salmonella typhimurium*. Mol Gen Genet. 139(3):177-188.

Bullas LR, Ryu JI. 1983. *Salmonella typhimurium* LT2 strains which are r- m+ for all three chromosomally located systems of DNA restriction and modification. J Bacteriol. 156(1):471-474.

Joys TM, Stocker BA. 1965. Complementation of non-flagellate *Salmonella* mutants. J Gen Microbiol. 41(1):47-55.

Joys TM, Stocker BA. 1969. Recombination in H1, the gene determining the flagellar antigen-i of *Salmonella typhimurium*; mapping of H1 and *fla* mutations. J Gen Microbiol. 58(2):267-275.

Kuo TT, Stocker BA. 1970. ES18, a general transducing phage for smooth and nonsmooth *Salmonella typhimurium.* Virology. 42(3):621-632.

Spicer CC, Datta N. 1959. Reversion of transduced antigenic characters in *Salmonella typhimurium*. J Gen Microbiol. 20(1):136-143.

Wilkinson RG, Gemski P, Jr., Stocker BA. 1972. Non-smooth mutants of *Salmonella typhimurium*: Differentiation by phage sensitivity and genetic mapping. J Gen Microbiol. 70(3):527-554.

Zinder ND, Lederberg J. 1952. Genetic exchange in *Salmonella*. J Bacteriol. 64(5):679-699.
